# Supplementary material for: INSTIs and NNRTIs Potently Inhibit HIV-1 Polypurine Tract Mutants in a Single Round Infection Assay
Source: MDPI journal article supplement (doi:10.3390/v13122501), 2021-12-14
Supplement: s1 [file s1]

**Table S1.** Comparison of antiviral potencies of INSTIs against a panel of HIV-1 PPT mutants.

|            | WT              | AGC            | AGT            | +G             |
|------------|-----------------|----------------|----------------|----------------|
| <b>BIC</b> | 0.48 ± 0.09 nM  | 0.49 ± 0.07 nM | 0.49 ± 0.06 nM | 0.55 ± 0.10 nM |
| <b>DTG</b> | 1.1 ± 0.1 nM    | 0.86 ± 0.06 nM | 0.67 ± 0.08 nM | 0.77 ± 0.06 nM |
| <b>CAB</b> | 0.9 ± 0.02 nM   | 0.79 ± 0.1 nM  | 2.4 ± 0.3 nM   | 0.66 ± 0.04 nM |
| <b>RAL</b> | 3.0 ± 0.4 nM    | 1.5 ± 0.3 nM   | 3.0 ± 0.5 nM   | 2.1 ± 0.3 nM   |
| <b>EVG</b> | 1.1 ± 0.3 nM    | 0.52 ± 0.06 nM | 0.51 ± 0.04 nM | 0.53 ± 0.05 nM |
| <b>4c</b>  | 3.8 ± 0.3 nM    | 2.4 ± 0.5 nM   | 3.2 ± 0.4 nM   | 2.8 ± 0.5 nM   |
| <b>4d</b>  | 0.67 ± 0.09 nM  | 0.5 ± 0.05 nM  | 0.6 ± 0.1 nM   | 0.58 ± 0.09 nM |
| <b>4f</b>  | 0.91 ± 0.11 nM  | 0.9 ± 0.1 nM   | 0.69 ± 0.05 nM | 0.78 ± 0.07 nM |
| <b>6b</b>  | 0.53 ± 0.02 nM  | 0.41 ± 0.04 nM | 0.53 ± 0.18 nM | 0.47 ± 0.08 nM |
| <b>6v</b>  | 195.0 ± 27.2 nM | 85.4 ± 7.5 nM  | 60.5 ± 3.8 nM  | 123.9 ± 3.3 nM |

**Table S1. Comparison of antiviral potencies of INSTIs against a panel of HIV-1 PPT mutants.** The EC<sub>50</sub> values and the standard deviation (n=3) of the FDA-approved INSTIs BIC, DTG, CAB, RAL, and EVG and our compounds 4c, 4d, 4f, 6b, and 6v against WT HIV and the HIV-1 PPT mutants are shown.

**Table S2.** Comparison of antiviral potencies of NNRTIs against a panel of HIV-1 PPT mutants.

|            | WT             | AGC            | AGT            | +G             |
|------------|----------------|----------------|----------------|----------------|
| <b>EFV</b> | 0.1 ± 0.01 nM  | 0.11 ± 0.02 nM | 0.1 ± 0.01 nM  | 0.12 ± 0.01 nM |
| <b>RPV</b> | 0.15 ± 0.02 nM | 0.14 ± 0.03 nM | 0.14 ± 0.03 nM | 0.2 ± 0.02 nM  |
| <b>DOR</b> | 0.34 ± 0.04 nM | 0.3 ± 0.03 nM  | 0.27 ± 0.02 nM | 0.36 ± 0.02 nM |
| <b>6</b>   | 0.15 ± 0.03 nM | 0.12 ± 0.01 nM | 0.14 ± 0.02 nM | 0.16 ± 0.02 nM |
| <b>7</b>   | 0.15 ± 0.01 nM | 0.18 ± 0.02 nM | 0.19 ± 0.02 nM | 0.17 ± 0.01 nM |
| <b>11</b>  | 0.15 ± 0.01 nM | 0.17 ± 0.03 nM | 0.19 ± 0.02 nM | 0.17 ± 0.02 nM |
| <b>12</b>  | 0.3 ± 0.04 nM  | 0.39 ± 0.03 nM | 0.26 ± 0.05 nM | 0.39 ± 0.06 nM |
| <b>13</b>  | 0.21 ± 0.03 nM | 0.26 ± 0.02 nM | 0.14 ± 0.02 nM | 0.25 ± 0.02 nM |
| <b>16</b>  | 0.1 ± 0.0 nM   | 0.05 ± 0.01 nM | 0.08 ± 0.01 nM | 0.09 ± 0.01 nM |
| <b>27</b>  | 0.15 ± 0.03 nM | 0.12 ± 0.01 nM | 0.11 ± 0.01 nM | 0.16 ± 0.01 nM |

**Table S2. Comparison of antiviral potencies of NNRTIs against a panel of HIV-1 PPT mutants.**  
The EC<sub>50</sub> values and standard deviation (n=3) of the FDA-approved NNRTIs EFV, RPV, and DOR and our compounds 6, 7, 11, 12, 13, 16, and 27 against WT HIV and a panel of HIV-1 PPT mutants are shown.
